# Supplementary material
Source: publisher figshare collection journal article supplement (https://acs.figshare.com/ndownloader/files/13747046)
Supplement: Supplementary file 1 [file 13747046]

# Supporting Information

## Mechanisms of Semiconducting 2H to Metallic 1T Phase Transition in Two-dimensional MoS<sub>2</sub> Nanosheets

**Qiu Jin,<sup>†,‡</sup> Ning Liu,<sup>†,§</sup> Biaohua Chen,<sup>\*,†,§</sup> Donghai Mei<sup>\*,‡</sup>**

<sup>†</sup>State Key Laboratory of Chemical Resource Engineering, Beijing University of Chemical Technology,  
Beijing, 100029, China

<sup>‡</sup>Institute of Integrated Catalysis, Pacific Northwest National Laboratory, Richland, Washington  
99352, United States

<sup>§</sup>College of Environmental and Energy Engineering, Beijing University of Technology, Beijing,  
100022, China

\* Corresponding authors:

[chenbh@mail.buct.edu.cn](mailto:chenbh@mail.buct.edu.cn) (B. Chen); [donghai.mei@pnnl.gov](mailto:donghai.mei@pnnl.gov) (D. Mei);

**Figure S1.** Calculated phase transition mechanisms for the Mo edge with 100%S.

**Figure S2.** Optimized edges of 2H-MoS<sub>2</sub>. (a) Mo-edge with 0% S coverage; (b) Mo-edge with 50% S coverage; (c) S-edge with 50% S coverage; (d) S-edge with 100% S coverage.

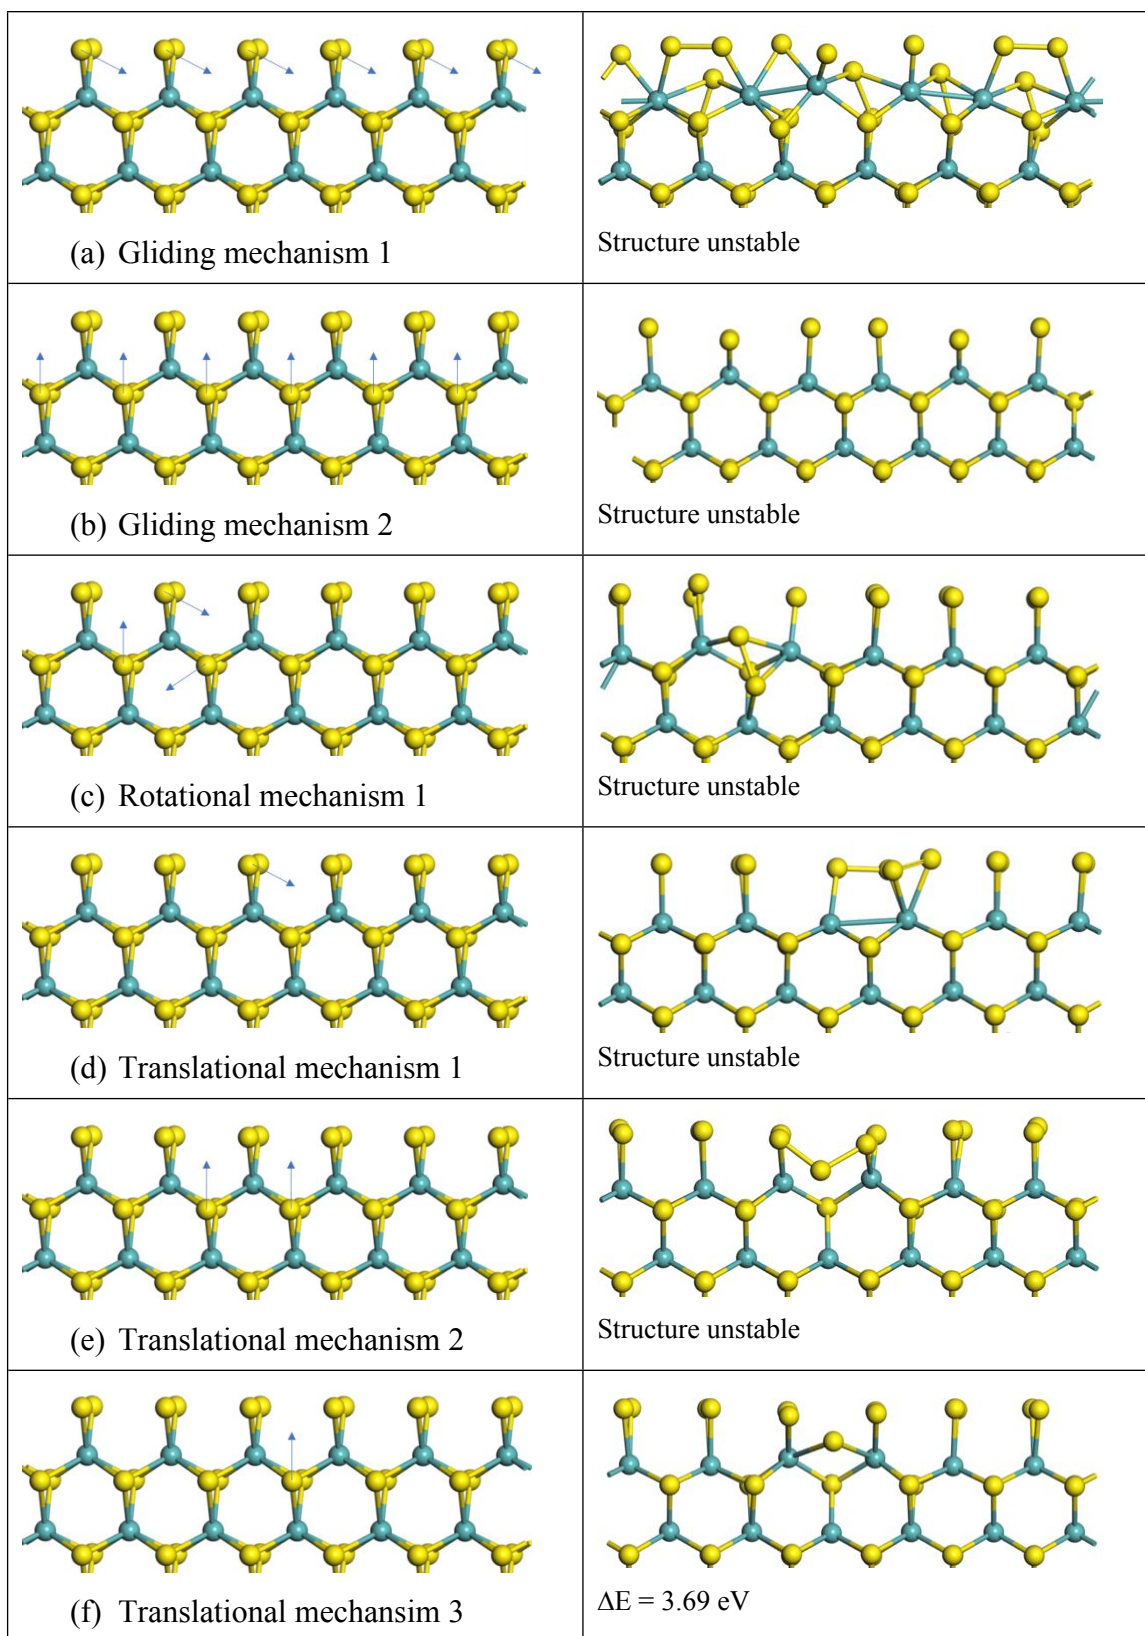

**Figure S1.** Calculated phase transition mechanisms for the Mo edge with 100%S.

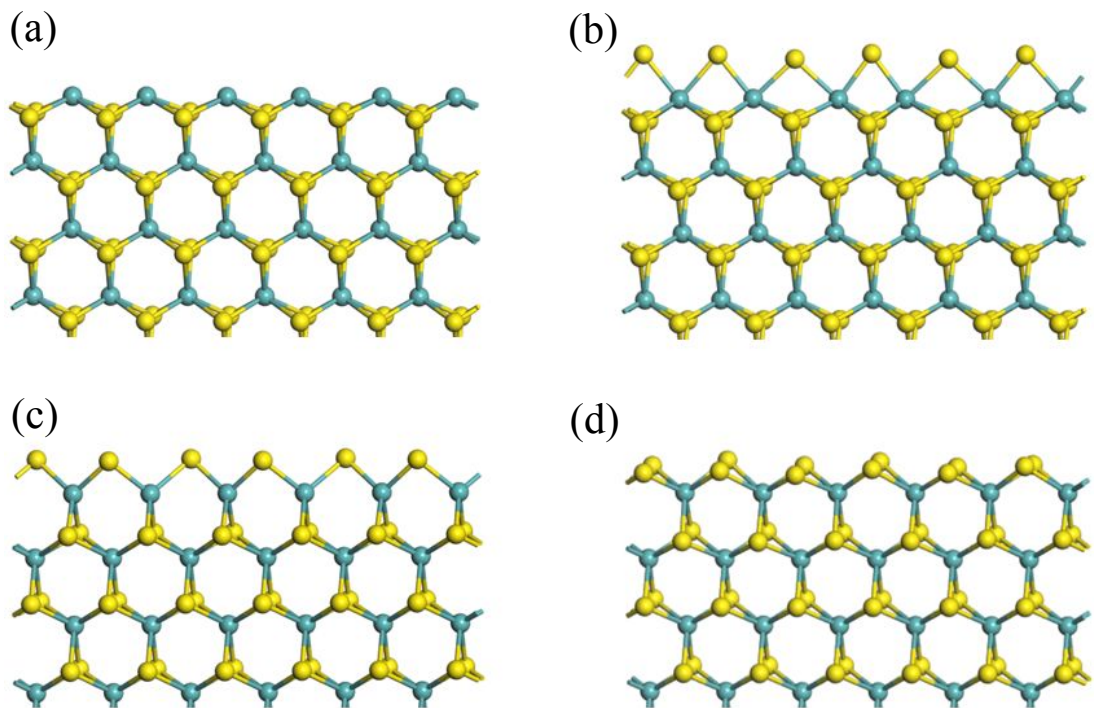

**Figure S2.** Optimized edges of 2H-MoS<sub>2</sub>. (a) Mo-edge with 0% S coverage; (b) Mo-edge with 50% S coverage; (c) S-edge with 50% S coverage; (d) S-edge with 100% S coverage.
